# Supplementary material
Source: publisher figshare collection journal article supplement (https://geolsoc.figshare.com/articles/dataset/_/3454526)
Supplement: Supplementary file 1 [file 1]

   


Appendix 1e																				
Summary of U-Pb data of sample 113-177 from the upper Ladegårdsåen fm. at Peary land	 	
				Ratios				Ages	
Name	U	206Pb	206Pbc*	206Pb	207Pb		207Pb		206Pb		Rho	Disc. (%) †	207Pb		207Pb		206Pb		
 	ppm	ppm	(%)	204Pb	206Pb	1ó	235U	1ó	238U	1ó	 	C.	Min.	206Pb	1ó	235U	1ó	238U	1ó	
113-177-001	88	15	.	4583	0.0741	0.0003	1.7389	0.0159	0.1703	0.0013	0.910	-3.1	-1.1	1043	8	1023	6	1014	7	
113-177-002	126	44	.	23048	0.1132	0.0003	5.2239	0.0340	0.3348	0.0021	0.944	0.6	.	1851	5	1857	6	1862	10	
113-177-003	20	11	.	5689	0.1929	0.0011	14.2074	0.2621	0.5342	0.0101	0.964	-0.4	.	2767	9	2764	18	2759	42	
113-177-004	40	15	0.18	6726	0.1275	0.0004	6.4601	0.0547	0.3676	0.0028	0.940	-2.6	-1.6	2064	6	2040	7	2018	13	
113-177-005	162	50	.	30250	0.1032	0.0003	4.2609	0.0272	0.2994	0.0019	0.950	0.3	.	1683	4	1686	5	1688	10	
113-177-006	75	26	.	16116	0.1127	0.0003	5.1788	0.0370	0.3333	0.0022	0.924	0.7	.	1843	6	1849	6	1854	11	
113-177-007	95	7	.	3200	0.0556	0.0003	0.5394	0.0049	0.0704	0.0005	0.702	0.4	.	437	12	438	3	438	3	
113-177-008	281	53	.	23149	0.0751	0.0002	1.8958	0.0122	0.1832	0.0010	0.912	1.5	.	1070	6	1080	4	1084	5	
113-177-009	55	10	.	3090	0.0745	0.0003	1.8439	0.0133	0.1796	0.0012	0.861	1.1	.	1054	8	1061	5	1065	7	
113-177-010	163	28	.	18472	0.0721	0.0003	1.6718	0.0104	0.1683	0.0008	0.783	1.6	.	988	7	998	4	1003	4	
113-177-011	110	61	.	12684	0.1940	0.0005	14.3929	0.0714	0.5382	0.0025	0.944	.	.	2776	4	2776	5	2776	10	
113-177-012	103	35	.	7179	0.1124	0.0003	5.1094	0.0297	0.3298	0.0018	0.894	.	.	1838	5	1838	5	1837	9	
113-177-013	96	32	0.29	7349	0.1100	0.0004	4.9423	0.0321	0.3260	0.0019	0.895	1.3	.	1799	6	1810	5	1819	9	
113-177-014	42	14	.	6164	0.1131	0.0006	5.0726	0.0592	0.3253	0.0036	0.916	-2.1	-0.3	1850	8	1832	10	1816	17	
113-177-015	200	38	.	4293	0.0748	0.0003	1.8714	0.0114	0.1814	0.0010	0.804	1	.	1064	7	1071	4	1074	5	
113-177-016	72	44	0.37	4223	0.2167	0.0005	17.6295	0.1219	0.5900	0.0041	0.951	1.4	.	2957	4	2970	7	2989	17	
113-177-017	34	8	.	546	0.0891	0.0004	2.7926	0.0288	0.2274	0.0023	0.930	-6.6	-5	1405	8	1354	8	1321	12	
113-177-018	90	50	.	53959	0.1883	0.0005	13.8365	0.1047	0.5331	0.0040	0.921	1.2	.	2727	4	2739	7	2754	17	
113-177-019	303	24	.	652	0.0705	0.0003	0.7374	0.0047	0.0759	0.0004	0.584	-51.8	-50.3	943	8	561	3	471	3	
113-177-020	87	51	0.34	4379	0.2071	0.0005	16.1661	0.1088	0.5662	0.0037	0.951	0.4	.	2883	3	2887	6	2892	15	
113-177-021	360	27	.	1790	0.0571	0.0002	0.5732	0.0040	0.0728	0.0005	0.802	-8.9	-4.7	496	8	460	3	453	3	
113-177-022	52	9	.	1500	0.0718	0.0003	1.6162	0.0152	0.1633	0.0014	0.897	-0.5	.	979	9	977	6	975	8	
113-177-023	156	46	0.27	6107	0.0981	0.0003	3.8634	0.0364	0.2856	0.0026	0.924	2.2	.	1588	6	1606	8	1620	13	
Appendix 1e (continued)																		
				Ratios				Ages	
Name	U	206Pb	206Pbc*	206Pb	207Pb		207Pb		206Pb		Rho	Disc. (%) †	207Pb		207Pb		206Pb		
 	ppm	ppm	(%)	204Pb	206Pb	1ó	235U	1ó	238U	1ó	 	C.	Min.	206Pb	1ó	235U	1ó	238U	1ó	
113-177-024	128	39	.	16291	0.1012	0.0005	4.0653	0.0448	0.2914	0.0031	0.895	0.1	.	1646	9	1647	9	1648	15	
113-177-025	468	114	.	71478	0.0853	0.0002	2.7684	0.0158	0.2354	0.0013	0.962	3.4	1.9	1322	5	1347	4	1363	7	
113-177-026	133	40	.	14651	0.1005	0.0003	3.9971	0.0240	0.2885	0.0020	0.922	.	.	1633	5	1634	5	1634	10	
113-177-028	85	26	0.19	8125	0.1028	0.0003	4.1880	0.0239	0.2955	0.0018	0.946	-0.4	.	1675	5	1672	5	1669	9	
113-177-029	29	14	0.43	3745	0.1736	0.0007	11.4410	0.1325	0.4780	0.0055	0.970	-3.5	-2.6	2593	6	2560	11	2519	24	
113-177-030	124	42	.	27944	0.1101	0.0003	4.9564	0.0325	0.3266	0.0023	0.951	1.3	.	1801	4	1812	6	1822	11	
113-177-031	165	83	0.06	41110	0.1806	0.0005	12.1170	0.0832	0.4866	0.0033	0.953	-4.7	-4	2659	4	2613	6	2556	14	
113-177-032	240	82	.	50393	0.1106	0.0003	5.0674	0.0328	0.3323	0.0022	0.948	2.5	0.8	1810	4	1831	5	1849	11	
113-177-033	90	72	.	40265	0.3369	0.0008	35.9232	0.2291	0.7735	0.0051	0.966	1.6	.	3649	3	3664	6	3694	18	
113-177-034	88	27	.	9053	0.1008	0.0003	4.0761	0.0285	0.2932	0.0022	0.938	1.3	.	1639	5	1650	6	1658	11	
113-177-035	151	58	0.08	17457	0.1258	0.0003	6.4222	0.0260	0.3702	0.0017	0.938	-0.6	.	2040	4	2035	4	2031	8	
113-177-036	66	36	0.13	12176	0.1885	0.0004	13.6914	0.0768	0.5269	0.0031	0.963	.	.	2729	4	2729	5	2728	13	
113-177-037	87	31	.	7964	0.1174	0.0003	5.6810	0.0279	0.3511	0.0019	0.932	1.4	.	1916	4	1928	4	1940	9	
113-177-038	80	45	0.05	20610	0.1994	0.0004	14.9921	0.0696	0.5454	0.0029	0.954	-0.7	-0.2	2821	3	2815	4	2806	12	
113-177-039	321	74	0.47	3039	0.0831	0.0002	2.5258	0.0112	0.2205	0.0009	0.904	1.1	.	1271	5	1279	3	1284	5	
113-177-040	35	6	.	1938	0.0739	0.0003	1.7585	0.0154	0.1727	0.0015	0.884	-1.1	.	1038	8	1030	6	1027	8	
113-177-041	47	21	0.52	2453	0.1556	0.0004	9.2226	0.0612	0.4298	0.0030	0.952	-5.1	-4.5	2409	4	2360	6	2305	13	
113-177-042	71	33	0.33	4072	0.1578	0.0004	9.8356	0.0444	0.4522	0.0021	0.900	-1.3	-0.6	2432	4	2419	4	2405	9	
113-177-043	233	73	0.88	1628	0.1725	0.0009	7.1185	0.1123	0.2993	0.0047	0.977	-39.3	-38.6	2582	8	2126	14	1688	23	
113-177-044	114	41	.	5594	0.1168	0.0004	5.6287	0.0343	0.3494	0.0015	0.943	1.4	0.7	1908	6	1921	5	1932	7	
113-177-045	138	34	0.33	5155	0.0856	0.0003	2.7717	0.0166	0.2349	0.0010	0.840	2.6	1.5	1329	7	1348	4	1360	5	
113-177-046	302	109	0.30	4541	0.1682	0.0007	8.0582	0.0661	0.3475	0.0024	0.969	-28	-27.6	2540	6	2238	7	1923	11	
113-177-047	46	11	.	2813	0.0845	0.0005	2.5977	0.0264	0.2229	0.0018	0.891	-0.6	.	1304	10	1300	7	1297	9	
113-177-048	51	40	0.41	2995	0.3479	0.0014	36.9465	0.2642	0.7703	0.0043	0.961	-0.6	-0.1	3698	6	3692	7	3682	16	
113-177-049	115	38	.	1970	0.1087	0.0004	4.7985	0.0277	0.3203	0.0013	0.916	0.9	0.2	1777	7	1785	5	1791	6	
113-177-050	52	29	.	2567	0.1911	0.0008	14.1341	0.1206	0.5366	0.0039	0.955	0.8	.	2751	7	2759	8	2769	16	
113-177-051	138	35	0.28	6667	0.0888	0.0003	3.0020	0.0164	0.2451	0.0010	0.751	1	.	1401	7	1408	4	1413	5	
113-177-052	152	39	0.12	15868	0.0968	0.0004	3.3004	0.0180	0.2472	0.0010	0.846	-10	-9	1564	6	1481	4	1424	5	
113-177-053	693	96	0.61	2386	0.0695	0.0003	1.2777	0.0079	0.1334	0.0006	0.752	-12.3	-10.5	913	10	836	4	807	3	
113-177-054	158	54	.	23311	0.1117	0.0004	5.0791	0.0293	0.3298	0.0015	0.925	0.6	.	1828	7	1833	5	1837	7	
113-177-055	121	36	.	15954	0.0991	0.0004	3.8808	0.0246	0.2841	0.0014	0.902	0.4	.	1607	7	1610	5	1612	7	
113-177-056	90	30	.	7845	0.1108	0.0005	4.9682	0.0382	0.3252	0.0022	0.943	0.1	.	1813	7	1814	6	1815	11	
113-177-057	144	10	.	2400	0.0567	0.0003	0.5286	0.0040	0.0676	0.0003	0.559	-12.3	-6.3	479	11	431	3	422	2	
113-177-058	109	29	.	4680	0.0991	0.0008	3.5771	0.0442	0.2617	0.0028	0.867	-7.6	-5.4	1608	14	1544	10	1499	14	
113-177-059	124	51	0.14	16084	0.1435	0.0005	7.8539	0.0669	0.3969	0.0031	0.968	-6	-5.3	2270	6	2214	8	2155	14	
113-177-060	61	20	.	11261	0.1113	0.0005	5.0124	0.0582	0.3266	0.0035	0.950	.	.	1821	8	1821	10	1822	17	
113-177-061	142	70	0.16	10020	0.2147	0.0008	14.3915	0.1598	0.4863	0.0048	0.969	-15.9	-15.3	2941	6	2776	11	2555	21	
113-177-062	22	4	.	2590	0.0780	0.0008	1.9704	0.0440	0.1833	0.0036	0.886	-5.9	-0.8	1147	19	1105	15	1085	20	
Appendix 1e (continued)																		
				Ratios				Ages	
Name	U	206Pb	206Pbc*	206Pb	207Pb		207Pb		206Pb		Rho	Disc. (%) †	207Pb		207Pb		206Pb		
 	ppm	ppm	(%)	204Pb	206Pb	1ó	235U	1ó	238U	1ó	 	C.	Min.	206Pb	1ó	235U	1ó	238U	1ó	
113-177-063	64	21	0.13	5713	0.1108	0.0005	4.9893	0.0535	0.3266	0.0029	0.922	0.6	.	1813	8	1818	9	1822	14	
113-177-064	114	40	0.21	32689	0.1196	0.0005	5.7261	0.0442	0.3473	0.0021	0.885	-1.7	-0.5	1950	7	1935	7	1922	10	
113-177-065	97	31	0.25	9441	0.1067	0.0005	4.5883	0.0379	0.3121	0.0020	0.842	0.5	.	1743	8	1747	7	1751	10	
113-177-066	252	87	.	18284	0.1152	0.0004	5.3690	0.0281	0.3382	0.0014	0.899	-0.3	.	1882	5	1880	4	1878	7	
113-177-067	362	72	.	7741	0.0786	0.0003	2.1274	0.0113	0.1964	0.0007	0.769	-0.6	.	1162	6	1158	4	1156	4	
113-177-068	63	37	0.63	1950	0.2287	0.0009	18.4040	0.1771	0.5838	0.0049	0.947	-3.2	-2.4	3043	6	3011	9	2964	20	
113-177-069	442	84	1.50	977	0.1652	0.0006	4.1865	0.0425	0.1839	0.0017	0.966	-61.4	-61.1	2509	6	1671	8	1088	9	
113-177-070	185	51	0.74	1916	0.1116	0.0006	4.1664	0.0314	0.2709	0.0019	0.912	-17.3	-16.3	1825	11	1667	6	1545	10	
113-177-071	11	2	.	255	0.0832	0.0015	2.5155	0.1103	0.2193	0.0104	0.924	0.3	.	1274	33	1277	32	1278	55	
113-177-072	21	9	2.10	549	0.1218	0.0009	6.8232	0.1669	0.4063	0.0085	0.970	12.8	8	1983	13	2089	22	2198	39	
113-177-073	26	14	1.20	1741	0.1816	0.0014	13.1077	0.3212	0.5236	0.0116	0.957	2.1	.	2667	13	2687	23	2714	49	
113-177-074	34	7	.	687	0.0826	0.0006	2.3531	0.0311	0.2066	0.0027	0.908	-4.3	-1.5	1260	13	1229	9	1211	14	
113-177-075	27	9	.	428	0.1115	0.0008	5.0714	0.0874	0.3300	0.0057	0.955	0.9	.	1824	12	1831	15	1838	27	
113-177-076	123	22	.	992	0.0736	0.0004	1.7494	0.0111	0.1723	0.0009	0.841	-0.7	.	1032	10	1027	4	1025	5	
113-177-077	169	32	.	4505	0.0754	0.0004	1.9204	0.0104	0.1847	0.0007	0.837	1.3	.	1080	9	1088	4	1092	4	
113-177-078	57	4	.	263	0.0552	0.0005	0.4890	0.0057	0.0643	0.0005	0.683	-4.5	.	420	19	404	4	402	3	
113-177-079	28	6	.	1544	0.0841	0.0005	2.5665	0.0376	0.2214	0.0030	0.937	-0.5	.	1295	12	1291	11	1289	16	
113-177-080	177	54	.	19959	0.1028	0.0004	4.2262	0.0248	0.2983	0.0017	0.903	0.5	.	1675	8	1679	5	1683	8	
113-177-081	209	64	0.03	18383	0.1049	0.0004	4.3617	0.0259	0.3017	0.0013	0.935	-0.8	-0.1	1712	8	1705	5	1700	7	
113-177-082	161	34	0.35	3549	0.0849	0.0004	2.3914	0.0154	0.2042	0.0011	0.869	-9.7	-8.4	1314	8	1240	5	1198	6	
113-177-083	89	48	.	7646	0.1904	0.0008	13.9943	0.0830	0.5332	0.0030	0.941	0.4	.	2745	7	2749	6	2755	13	
113-177-084	57	20	.	3717	0.1179	0.0006	5.6177	0.0470	0.3457	0.0027	0.945	-0.6	.	1924	8	1919	7	1914	13	
113-177-085	245	82	.	17618	0.1117	0.0005	5.0291	0.0255	0.3266	0.0013	0.906	-0.3	.	1827	8	1824	4	1822	7	
113-177-086	101	59	.	15293	0.2141	0.0012	17.0579	0.1403	0.5778	0.0041	0.933	0.1	.	2937	9	2938	8	2940	17	
113-177-087	410	66	0.07	17556	0.0707	0.0004	1.5287	0.0140	0.1567	0.0011	0.950	-1.3	.	950	10	942	6	939	6	
113-177-088	298	87	.	18241	0.1004	0.0004	3.9868	0.0208	0.2880	0.0012	0.902	.	.	1632	8	1632	4	1631	6	
113-177-091	181	51	0.08	12591	0.1040	0.0005	3.9439	0.0279	0.2750	0.0014	0.926	-8.7	-7.9	1697	9	1623	6	1566	7	
113-177-092	130	71	.	32818	0.1943	0.0009	14.3934	0.0811	0.5373	0.0024	0.955	-0.3	.	2779	7	2776	5	2772	10	
113-177-093	61	12	.	6235	0.0768	0.0004	2.0004	0.0167	0.1889	0.0015	0.891	-0.1	.	1117	10	1116	6	1115	8	
113-177-094	65	15	.	7431	0.0851	0.0005	2.6778	0.0218	0.2283	0.0019	0.841	0.7	.	1317	11	1322	6	1326	10	
113-177-095	396	114	0.09	22927	0.0992	0.0004	3.8715	0.0227	0.2832	0.0016	0.946	-0.1	.	1608	8	1608	5	1608	8	
113-177-096	39	22	0.14	9580	0.1994	0.0010	14.8903	0.1705	0.5416	0.0058	0.959	-1.4	-0.4	2821	8	2808	11	2790	24	
113-177-097	99	32	.	12590	0.1090	0.0005	4.7863	0.0335	0.3186	0.0020	0.947	.	.	1782	8	1782	6	1783	10	
113-177-098	47	15	.	3765	0.1094	0.0006	4.8635	0.0518	0.3224	0.0032	0.943	0.7	.	1790	9	1796	9	1801	15	
113-177-099	142	34	0.05	17904	0.0872	0.0004	2.8122	0.0163	0.2340	0.0010	0.877	-0.7	.	1364	8	1359	4	1355	5	
113-177-100	304	93	0.07	21942	0.1048	0.0004	4.3545	0.0228	0.3015	0.0012	0.908	-0.7	.	1710	7	1704	4	1699	6	
113-177-101	41	22	.	8558	0.1853	0.0010	13.2933	0.1568	0.5203	0.0062	0.941	.	.	2701	9	2701	11	2700	26	
113-177-102	42	23	0.18	5682	0.1941	0.0009	14.2572	0.1371	0.5329	0.0044	0.959	-1	-0.3	2777	7	2767	9	2754	18	
Appendix 1e (continued)																		
				Ratios				Ages	
Name	U	206Pb	206Pbc*	206Pb	207Pb		207Pb		206Pb		Rho	Disc. (%) †	207Pb		207Pb		206Pb		
 	ppm	ppm	(%)	204Pb	206Pb	1ó	235U	1ó	238U	1ó	 	C.	Min.	206Pb	1ó	235U	1ó	238U	1ó	
113-177-103	106	37	.	28185	0.1147	0.0005	5.3451	0.0285	0.3380	0.0017	0.865	0.1	.	1875	7	1876	5	1877	8	
113-177-104	72	24	.	5402	0.1118	0.0005	5.0643	0.0460	0.3287	0.0029	0.956	0.2	.	1828	8	1830	8	1832	14	
113-177-105	288	53	.	20159	0.0745	0.0003	1.8506	0.0084	0.1801	0.0007	0.784	1.2	.	1056	8	1064	3	1068	4	
113-177-106	46	22	0.43	5744	0.1597	0.0008	10.2739	0.1042	0.4665	0.0048	0.939	0.8	.	2453	8	2460	9	2468	21	
113-177-107	153	36	.	5693	0.0856	0.0004	2.7050	0.0217	0.2293	0.0018	0.920	0.1	.	1329	8	1330	6	1331	9	
113-177-108	339	119	0.21	6700	0.1180	0.0005	5.6113	0.0339	0.3450	0.0015	0.928	-0.9	-0.2	1926	8	1918	5	1911	7	
113-177-109	32	5	.	451	0.0701	0.0005	1.5507	0.0258	0.1604	0.0023	0.918	3.1	.	932	15	951	10	959	13	
113-177-111	194	36	.	3753	0.0745	0.0003	1.8472	0.0102	0.1798	0.0009	0.828	1	.	1056	8	1062	4	1066	5	
113-177-112	78	24	.	4962	0.1020	0.0005	4.1615	0.0377	0.2960	0.0025	0.909	0.7	.	1661	9	1666	7	1671	13	
Oddballs																				
113-177-122	545	287	0.02	64845	0.1863	0.0007	13.3033	0.0788	0.5179	0.0026	0.958	-0.9	-0.4	2710	6	2701	6	2690	11	
113-177-126	122	29	.	6900	0.0865	0.0004	2.8143	0.0246	0.2360	0.0021	0.910	1.3	.	1349	8	1359	7	1366	11	
113-177-127	141	66	.	60954	0.1585	0.0006	10.0565	0.0527	0.4602	0.0020	0.908	.	.	2440	6	2440	5	2440	9	
113-177-128	235	83	.	18529	0.1150	0.0004	5.4982	0.0425	0.3469	0.0022	0.901	2.5	1.1	1879	7	1900	7	1920	10	
113-177-129	97	33	.	8719	0.1126	0.0005	5.2059	0.0373	0.3354	0.0022	0.907	1.4	.	1841	7	1854	6	1865	11	
113-177-131cr	60	1	.	1837	0.0488	0.0008	0.1308	0.0022	0.0194	0.0002	0.290	-10.6	.	139	36	125	2	124	1	
113-177-131r	47	1	.	418	0.0486	0.0010	0.1313	0.0032	0.0196	0.0002	0.552	-0.5	.	126	46	125	3	125	1	
113-177-136	19	8	.	2927	0.1551	0.0012	9.4707	0.2173	0.4429	0.0099	0.956	-2	.	2403	12	2385	21	2364	44	
113-177-138	137	29	.	4748	0.0802	0.0003	2.2797	0.0154	0.2062	0.0014	0.896	0.6	.	1202	8	1206	5	1208	8	
113-177-141	37	22	0.67	1904	0.2175	0.0013	17.6786	0.2249	0.5895	0.0074	0.944	1	.	2962	9	2972	12	2987	30	
																				
